# Supplementary material for: Exploring the Influence of Carbon Nanoparticles on the Formation of β-Sheet-Rich Oligomers of IAPP22–28 Peptide by Molecular Dynamics Simulation
Source: PubMed Central journal article supplement (PMC3674003; doi:10.1371/journal.pone.0065579), 2013-06-05
Supplement: pone.0065579.s002.pdf [file pone.0065579.s002.pdf]

**Table S1. Detailed information for the initial configuration of each system.**

| System              | Terms                  | 4 peptides                                                                          | 8 peptides                                                                            |
|---------------------|------------------------|-------------------------------------------------------------------------------------|---------------------------------------------------------------------------------------|
| Pep                 | PBC ( $\text{\AA}^3$ ) | 51.04×55.23×53.00                                                                   | 52.03×52.87×55.97                                                                     |
|                     | General view           | 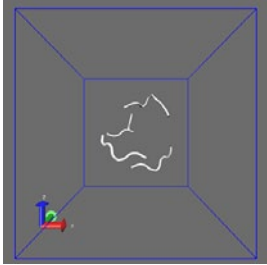   |    |
| Pep+C <sub>60</sub> | PBC ( $\text{\AA}^3$ ) | 46.64×53.03×50.12                                                                   | 58.58×62.24×58.91                                                                     |
|                     | General view           |   |   |
| Pep+Gra             | PBC ( $\text{\AA}^3$ ) | 92.21×92.77×49.00                                                                   | 96.13×78.98×63.09                                                                     |
|                     | General view           |  |  |
| Pep+SWCNT           | PBC ( $\text{\AA}^3$ ) | 46.11×51.07×53.00                                                                   | 66.46×58.08×58.91                                                                     |
|                     | General view           |  |  |
